# Supplementary material
Source: publisher figshare collection journal article supplement (https://gsapubs.figshare.com/articles/dataset/_/12915629)
Supplement: Supplementary file 1 [file 1]

# A link between rift-related volcanism and end-Ediacaran extinction? Integrated chemostratigraphy, biostratigraphy, and U-Pb geochronology from Sonora, Mexico: SUPPLEMENTAL MATERIAL

Eben B. Hodgin<sup>1\*</sup>, Lyle L. Nelson<sup>2\*</sup>, Corey J. Wall<sup>3</sup>, Arturo J. Barrón-Díaz<sup>4</sup>, Lucy C. Webb<sup>2</sup>, Mark D. Schmitz<sup>3</sup>, David A. Fike<sup>5</sup>, James W. Hagadorn<sup>6</sup>, Emily F. Smith<sup>2</sup>

<sup>1</sup>*Department of Earth and Planetary Sciences, Harvard University, Cambridge, MA 02138 USA*

<sup>2</sup>*Department of Earth and Planetary Sciences, Johns Hopkins University, Baltimore, MD 21218 USA*

<sup>3</sup>*Department of Geosciences, Boise State University, Boise, ID 83725 USA*

<sup>4</sup>*Departamento de Geología, Universidad de Sonora (UNISON), Hermosillo, 83000 Mexico*

<sup>5</sup>*Department of Earth and Planetary Sciences, Washington University, St. Louis, MO 63130 USA*

<sup>6</sup>*Department of Earth Sciences, Denver Museum of Nature & Science, Denver, CO 80205 USA*

\*[ebenblake@berkeley.edu](mailto:ebenblake@berkeley.edu), [lylelnelson@jhu.edu](mailto:lylelnelson@jhu.edu).

This Supplemental Material includes:

- 1) Section S1: Detailed methods (carbonate  $\delta^{13}\text{C}$  and  $\delta^{18}\text{O}$  isotopes, mineral separation and imaging, LA-ICPMS and CA-ID-TIMS U-Pb zircon geochronology);
- 2) Section S2: Diagenetically-altered tuffaceous deposits in marine carbonates;

- 3) Three supplemental tables (carbonate  $\delta^{13}\text{C}$  and  $\delta^{18}\text{O}$  isotopes, LA-ICPMS U-Pb data, CA-ID-TIMS U-Pb data); and
- 4) Five supplemental figures (carbonate C-O isotope cross-plot, lithic tuff photomicrographs, U-Pb Concordia and kernel density plots, 540 Ma zircon trace element geochemistry, and zircon CL images).

## SECTION S1: DETAILED METHODS

### *Carbonate Stable Isotopes*

Fist-sized carbonate samples were collected from measured stratigraphic sections, and fresh cut surfaces were microdrilled for powder along laminations, avoiding alteration textures. Samples from sections LV1801, LV1802, CC1801, CC1802, and CR1801 were analyzed at the Johns Hopkins University, while samples from sections CR1705, CR1804, and CR1805 were analyzed at Washington University in St. Louis.

At the Johns Hopkins University Department of Earth and Planetary Sciences Isotope Ratio Mass Spectrometer Laboratory, carbonate samples were analyzed for carbon and oxygen isotopic compositions ( $\delta^{13}\text{C}$ ,  $\delta^{18}\text{O}$ ) using a GasBench II peripheral device coupled to a Thermo-Finnigan MAT253 isotope ratio mass spectrometer (IRMS) in continuous-flow mode. Approximately 0.3 mg of sample carbonate powder reacted with 100% phosphoric acid in helium-purged vials at 30°C, overnight. Evolved  $\text{CO}_2$  gas was then analyzed against tank  $\text{CO}_2$  gas and isotopic results normalized to V-PDB (Vienna-Pee Dee Belemnite) per mil (‰) scale using working in house carbonate standards (ICM, Carrara Marble and IVA Analysentechnik, calcium carbonate) that are calibrated against international standards NBS-18 and IAEA-603. A 30°C acid fractionation factor of -1.42‰ was added to normalized dolomite  $\delta^{18}\text{O}$  values (Rosenbaum and Sheppard, 1986; Kim

et al., 2007). Standard deviation ( $1\sigma$ ) of  $\delta^{13}\text{C}$  and  $\delta^{18}\text{O}$  values for in house standards was  $<0.02\text{‰}$  and  $<0.14\text{‰}$ , respectively.

At Washington University in St. Louis, carbonate samples were prepared for carbon and oxygen isotopic analyses by dissolving  $\sim 100\text{ }\mu\text{g}$  in 100% phosphoric acid ( $\text{H}_3\text{PO}_4$ ) for at least 4 hours at  $70^\circ\text{C}$ . Sample vials were subsequently flushed with He and the evolved  $\text{CO}_2$  was measured on a Thermo Finnigan Gasbench II coupled to a Delta V Advantage IRMS. Carbon and oxygen isotopes are expressed in standard delta notation ( $\delta^{13}\text{C}$ ,  $\delta^{18}\text{O}$ ) in per mil (‰) as a deviation from the V-PDB standard by calibration against NBS 19, NBS 20, and two in-house standards. A  $70^\circ\text{C}$  acid fractionation factor of  $-1.21\text{‰}$  was added to normalized dolomite  $\delta^{18}\text{O}$  values (Rosenbaum and Sheppard, 1986; Kim et al., 2007). From standard and replicate measurements, the  $1\sigma$  error on  $\delta^{13}\text{C}$  is  $<0.15\text{‰}$  and  $\delta^{18}\text{O}$  is  $<0.2\text{‰}$ .

### ***Mineral Separation and Zircon Imaging***

Zircon grains were separated from rock samples using a sledge, Retsch DM200 disc mill,  $500\text{ }\mu\text{m}$  sieve, and Wilfley Shaker Table at Harvard University. Separation proceeded using a Frantz magnetic separator and methylene iodide heavy liquid at Massachusetts Institute of Technology. Heavy mineral separates were annealed at  $900^\circ\text{C}$  for  $>48$  hours in a muffle furnace. Grains were mounted in epoxy and polished. At the University of California Santa Barbara (USCB), a Centaurus cathodoluminescence (CL) detector attached to an FEI Quanta 400f field-emission scanning electron microscope (SEM) was used to obtain CL images of polished and carbon-coated grain mounts. At Boise State University (BSU), CL images of zircon were obtained with a JEOL JSM-300 SEM in combination with a Gatan MiniCL.

## 68 *LA-ICPMS U-Pb Zircon Geochronology*

69 At UCSB, zircon U-Pb geochronology and trace element analysis was carried out by laser ablation  
70 inductively coupled plasma mass spectrometry (LA-ICPMS) using a Photon Machines Excite 193  
71 nm Excimer laser coupled with a Nu Plasma 3D MC-ICPMS and Agilent 7700X quadrupole  
72 ICPMS, following the methods of Kylander-Clark et al. (2013). For each analysis, a 25  $\mu\text{m}$  spot  
73 size was ablated at 4 Hz for 15 seconds with a 20 second washout, following 2 shots of pre-  
74 ablation, using a fluence of  $\sim 1 \text{ J/cm}^2$ . The primary standards were 91500 ( $1062.4 \pm 0.4 \text{ Ma}$ )  
75 (Wiedenbeck et al., 1995) and GJ-1 (Jackson et al., 2004) for calibration of age and trace element  
76 composition, respectively. Bias and drift in U-Pb ratios were corrected using the  
77 program Iolite (Paton et al., 2010) following procedures detailed in Kylander-Clark et al. (2013).  
78 Plešovice was used as a secondary age standard ( $337.13 \pm 0.37 \text{ Ma}$ ) (Sláma et al., 2008), and  
79 yielded a  $^{206}\text{Pb}/^{238}\text{U}$  weighted mean date of  $334.8 \pm 1.0 \text{ Ma}$  (MSWD = 1.8,  $n = 10$ ). This internal  
80 uncertainty was not propagated for systematic biases.

81 At BSU, zircon was analyzed by LA-ICPMS using a ThermoElectron X-Series II  
82 quadrupole ICPMS and New Wave Research UP-213 Nd:YAG UV laser ablation system.  
83 Analytical protocols, standard materials, and data reduction software developed at BSU were used  
84 for acquisition and calibration of U-Pb dates and a suite of high field strength elements (HFSE)  
85 and rare earth elements (REE). Zircon were ablated with a laser spot 16  $\mu\text{m}$  wide using fluence  
86 and pulse rates of  $5 \text{ J/cm}^2$  and 10 Hz, respectively, during a 45 second analysis (15 second gas  
87 blank, 30 second ablation) excavating a pit 25  $\mu\text{m}$  deep. Ablated material was carried to the  
88 nebulizer flow of the plasma by a 1.2 L/min He gas stream. Total sweep duration is 950 ms, and  
89 quadrupole dwell times were 5 ms for Si and Zr, 40 ms for  $^{202}\text{Hg}$ ,  $^{204}\text{Pb}$ ,  $^{208}\text{Pb}$ ,  $^{232}\text{Th}$ , and  $^{238}\text{U}$ , 80  
90 ms for  $^{206}\text{Pb}$ , 200 ms for  $^{49}\text{Ti}$  and  $^{207}\text{Pb}$ , and 10 ms for all other HFSE and REE. Background count



91 rates were obtained prior to each spot analysis and subtracted from the raw count rate for each  
92 analyte. For concentration calculations, background-subtracted count rates were internally  
93 normalized to  $^{29}\text{Si}$  and calibrated with the primary standards NIST SRM-610 and -612 glasses.  
94 Ablation pits that intersected mineral inclusions were identified based on Ti and P excursions, and  
95 associated sweeps were discarded. U-Pb dates from these analyses were retained if U-Pb ratios  
96 appeared to have been unaffected by the inclusions. Mass 204 signals were typically  
97 indistinguishable from zero following subtraction of Hg backgrounds, and dates are thus reported  
98 without common Pb correction. The Ti-in-zircon thermometer was calculated using an average  
99  $\text{TiO}_2$  activity value of 0.8 in crustal rocks (Watson et al., 2006).

100 Zircon U-Pb data were collected in laser ablation experiments on January 6th, 2019 at  
101 UCSB and on August 19th, 2019 at BSU. For U-Pb and  $^{207}\text{Pb}/^{206}\text{Pb}$  dates, instrumental  
102 fractionation of the background-subtracted ratios was corrected, and dates were calibrated with  
103 respect to interspersed measurements of standards and reference materials. The primary standard  
104 Plešovice zircon (Sláma et al., 2008) was used to monitor time-dependent instrumental  
105 fractionation based on two analyses for every 10 analyses of unknown zircon. Secondary standards  
106 were also analysed twice for every 10 unknowns, and a secondary correction was applied to the  
107  $^{206}\text{Pb}/^{238}\text{U}$  dates using Seiland (530 Ma) and Zirconia (327 Ma).

108 Radiogenic isotope ratio and age error propagation for all analyses includes uncertainty  
109 contributions from counting statistics and background subtraction. These uncertainties are the local  
110 standard deviations of the polynomial fits to the interspersed primary standard measurements  
111 versus time for the time-dependent, relatively larger U-Pb fractionation factor, and the standard  
112 errors of the means of the consistently time-invariant and smaller  $^{207}\text{Pb}/^{206}\text{Pb}$  fractionation factor.  
113 These uncertainties are 1-5% (average of 2%) ( $2\sigma$ ) for  $^{206}\text{Pb}/^{238}\text{U}$  and 0.5-1.5% (average of 1%)

(2 $\sigma$ ) for  $^{207}\text{Pb}/^{206}\text{Pb}$ . Errors on dates from individual analyses are given at 2 $\sigma$ , and zircon LA-ICPMS results are in Table S2.

### ***CA-ID-TIMS U-Pb Zircon Geochronology***

U-Pb dates were obtained by the chemical abrasion isotope dilution thermal ionization mass spectrometry (CA-ID-TIMS) method from analyses composed of single zircon grains or fragments of grains, modified after (Mattinson, 2005). Annealed zircon was removed from the epoxy mounts based on LA-ICPMS data and CL image screening. Single grains or fragments were transferred to 3 ml Teflon PFA beakers, loaded into 300  $\mu\text{l}$  Teflon PFA microcapsules with 120  $\mu\text{l}$  of 29 M HF, placed in a large-capacity Parr vessel, and partially dissolved for 12 hours at 190°C.

The zircon grains or fragments were returned to 3 ml Teflon PFA beakers, HF removed, and rinsed in ultrapure  $\text{H}_2\text{O}$ , immersed in 3.5 M  $\text{HNO}_3$ , ultrasonically cleaned for one hour, and fluxed at 80°C for one hour. The  $\text{HNO}_3$  was removed and grains or fragments were rinsed twice in ultrapure  $\text{H}_2\text{O}$ , then reloaded into Teflon PFA and spiked with Boise State BSU1B tracer solution with a calibration of  $^{235}\text{U}/^{205}\text{Pb} = 77.93$  and  $^{233}\text{U}/^{235}\text{U} = 1.007066$ . Zircon was dissolved in Parr vessels in 120  $\mu\text{l}$  of 29 M HF at 220°C for 48 hours, dried to fluorides, and re-dissolved in 6 M HCl at 180°C overnight. Uranium and Pb were separated from the zircon matrix using an HCl-based anion-exchange chromatographic procedure (Krogh, 1973), eluted together, and dried with 2  $\mu\text{l}$  of 0.05 N  $\text{H}_3\text{PO}_4$ .

Uranium and Pb were loaded on a single outgassed Re filament in 5  $\mu\text{l}$  of a silica-gel/phosphoric acid mixture (Gerstenberger and Haase, 1997), and U and Pb isotopic measurements made on a GV IsotopX Phoenix multicollector thermal ionization mass spectrometer equipped with an ion-counting Daly detector. Pb isotopes for analyses with smaller

amounts of radiogenic Pb were measured by peak-jumping all isotopes on the Daly detector for 150 cycles, and corrected for  $0.16 \pm 0.06/\text{a.m.u.}$  ( $2\sigma$ ) mass fractionation. Pb isotopes for analyses with larger amounts of radiogenic Pb were measured by a Faraday-Daly routine that cycles 150-200 times between placing mass 204 in the axial Daly collector and masses 205-208 on the H1-H4 Faraday detectors to placing mass 205 in the axial Daly and masses 206-208 in the H1-H3 Faradays, providing real-time Daly gain correction. These results were corrected for  $0.10 \pm 0.06\text{‰}$ /a.m.u. ( $2\sigma$ ) mass fractionation. Transitory isobaric interferences due to high-molecular weight organics, particularly on  $^{204}\text{Pb}$  and  $^{207}\text{Pb}$ , disappeared within approximately 30 cycles. The ionization efficiency of each Pb isotope averaged  $10^4$  cps/pg. Linearity (to  $\geq 1.4 \times 10^6$  cps) and the associated deadtime correction of the Daly detector were monitored by repeated analyses of NBS982. Uranium was analyzed as  $\text{UO}_2^+$  ions in static Faraday mode on  $10^{11}$  or  $10^{12}$  ohm resistors for 200-300 cycles, and corrected for isobaric interference of  $^{233}\text{U}^{18}\text{O}^{16}\text{O}$  on  $^{235}\text{U}^{16}\text{O}^{16}\text{O}$  with an  $^{18}\text{O}/^{16}\text{O}$  of 0.00206. Ionization efficiency averaged 20 mV/ng of each U isotope. Uranium mass fractionation was corrected using the known  $^{233}\text{U}/^{235}\text{U}$  ratio of the tracer solutions.

CA-ID-TIMS U-Pb dates and uncertainties were calculated using the algorithms of (Schmitz and Schoene, 2007), and U decay constants recommended by (Jaffey et al., 1971).  $^{206}\text{Pb}/^{238}\text{U}$  ratios and dates were corrected for initial  $^{230}\text{Th}$  disequilibrium using a  $\text{Th}/\text{U}[\text{magma}] = 3.0 \pm 0.3$ , resulting in an increase in the  $^{206}\text{Pb}/^{238}\text{U}$  dates of  $\sim 0.09$  Ma. All common Pb in analyses was attributed to laboratory blank and subtracted based on the measured laboratory Pb isotopic composition and associated uncertainty. Uranium blanks were estimated at 0.013 pg.

CA-ID-TIMS weighted mean  $^{206}\text{Pb}/^{238}\text{U}$  dates were calculated from equivalent dates (pof  $> 0.05$ ) using Isoplot 3.0 (Ludwig, 2003). Errors on the weighted mean dates are given as  $\pm x / y / z$ , where x is the internal error based on analytical uncertainties only, including counting statistics,

subtraction of tracer solution, and blank and initial common Pb subtraction, y includes the tracer calibration uncertainty propagated in quadrature, and z includes the  $^{238}\text{U}$  decay constant uncertainty propagated in quadrature. Internal errors should be considered when comparing our dates with  $^{206}\text{Pb}/^{238}\text{U}$  dates from other laboratories that used the same EARTHTIME tracer solution or a tracer solution that was cross-calibrated using EARTHTIME gravimetric standards. Errors including the uncertainty in the tracer calibration should be considered when comparing our dates with those derived from other geochronological methods using the U-Pb decay scheme (for example LA-ICPMS). Errors including uncertainties in the tracer calibration and  $^{238}\text{U}$  decay constant (Jaffey et al., 1971) should be considered when comparing our dates with those derived from other decay schemes (for example  $^{40}\text{Ar}/^{39}\text{Ar}$ ,  $^{187}\text{Re}$ - $^{187}\text{Os}$ ). Errors for weighted mean dates and dates from individual grains are given at  $2\sigma$  and shown in Table S3.

## **SECTION S2: DIAGENETICALLY-ALTERED TUFFACEOUS DEPOSITS IN MARINE CARBONATES**

There are millimetric domains preserved within two thin sections of the dated sandy dolostone sample, CC1801-138, that are composed of a combination of finer grained (than the matrix) light green clay minerals, dolomite rhombs, hematite, secondary quartz, and porosity (Fig. S2D-G). These domains are interpreted as intraclasts that contain the same peloidal dolomite textures as the matrix. Therefore, the porosity associated with these intraclasts (evidenced by sparry dolomite and silica crystallization) may be due to dolomite replacement of primary calcite. Alternatively, these features are also consistent with an originally tuffaceous vitroclastic matrix of replaced and devitrified glass and secondary mineral infilling of original porosity. Similar diagenetic features and textures associated with originally tuffaceous components have

previously been observed in marine carbonate rocks. For example, biotite rich layers in pelagic carbonate successions from the Eocene-Oligocene of the Mediterranean basin have been identified as mineral relicts of ashfall deposits (Odin et al., 1991; Coccioni et al., 2008; Sahy et al., 2017). Altered clay-size fractions of illite, chlorite, and biotite associated with tuffs have also been documented from beds having undergone burial diagenesis (Ullah et al., 2020). Hematite pigment and neomorphism has also been reported, in association with altered clay in Paleozoic to Mesozoic marine tuffs (Kiipli et al., 2000; Chakraborty et al., 2018). In sample CC1801-138, petrographic evidence for alteration of clay and clay minerals to hematite, and evidence for clay-rich intraclasts with original porosity and abundant secondary silica, may thus be related to a minor component of reworked and diagenetically altered silicate ash. Such an interpretation is consistent with the characteristics and quality of the zircon crystals from the dated rock sample that make up a near-depositional population of reproducible  $^{206}\text{Pb}/^{238}\text{U}$  dates at  $539.40 \pm 0.23$  Ma.

#### SUPPLEMENTAL MATERIAL TABLE CAPTIONS

**Table S1.** Carbonate  $\delta^{13}\text{C}$  and  $\delta^{18}\text{O}$  isotopic data.

**Table S2.** LA-ICPMS U-Pb geochronologic analyses and trace element concentrations.

**Table S3.** CA-ID-TIMS U-Th-Pb isotopic data.

201 SUPPLEMENTAL MATERIAL FIGURES

202

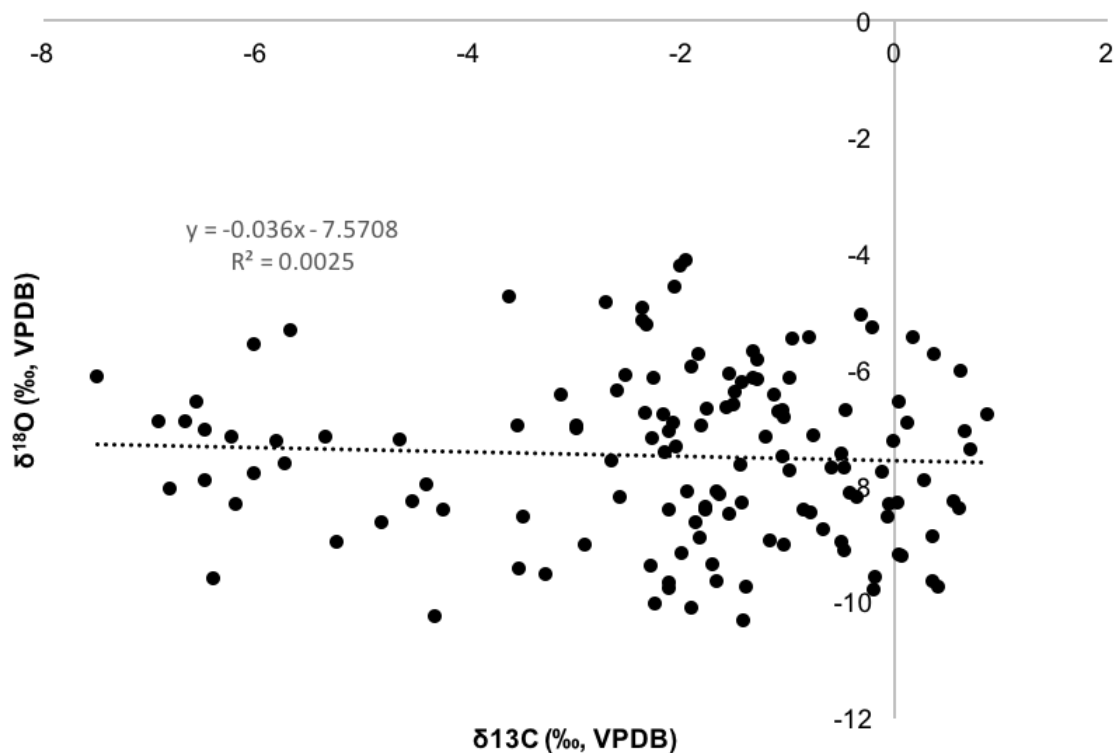

203  
 204 **Figure S1.** Carbon-oxygen isotope cross plot from the La Ciénega Fm. The dotted black line is a  
 205 linear regression fitted to the data (Fig. 1 and Table S1) with an  $R^2$  value of 0.0025.  
 206



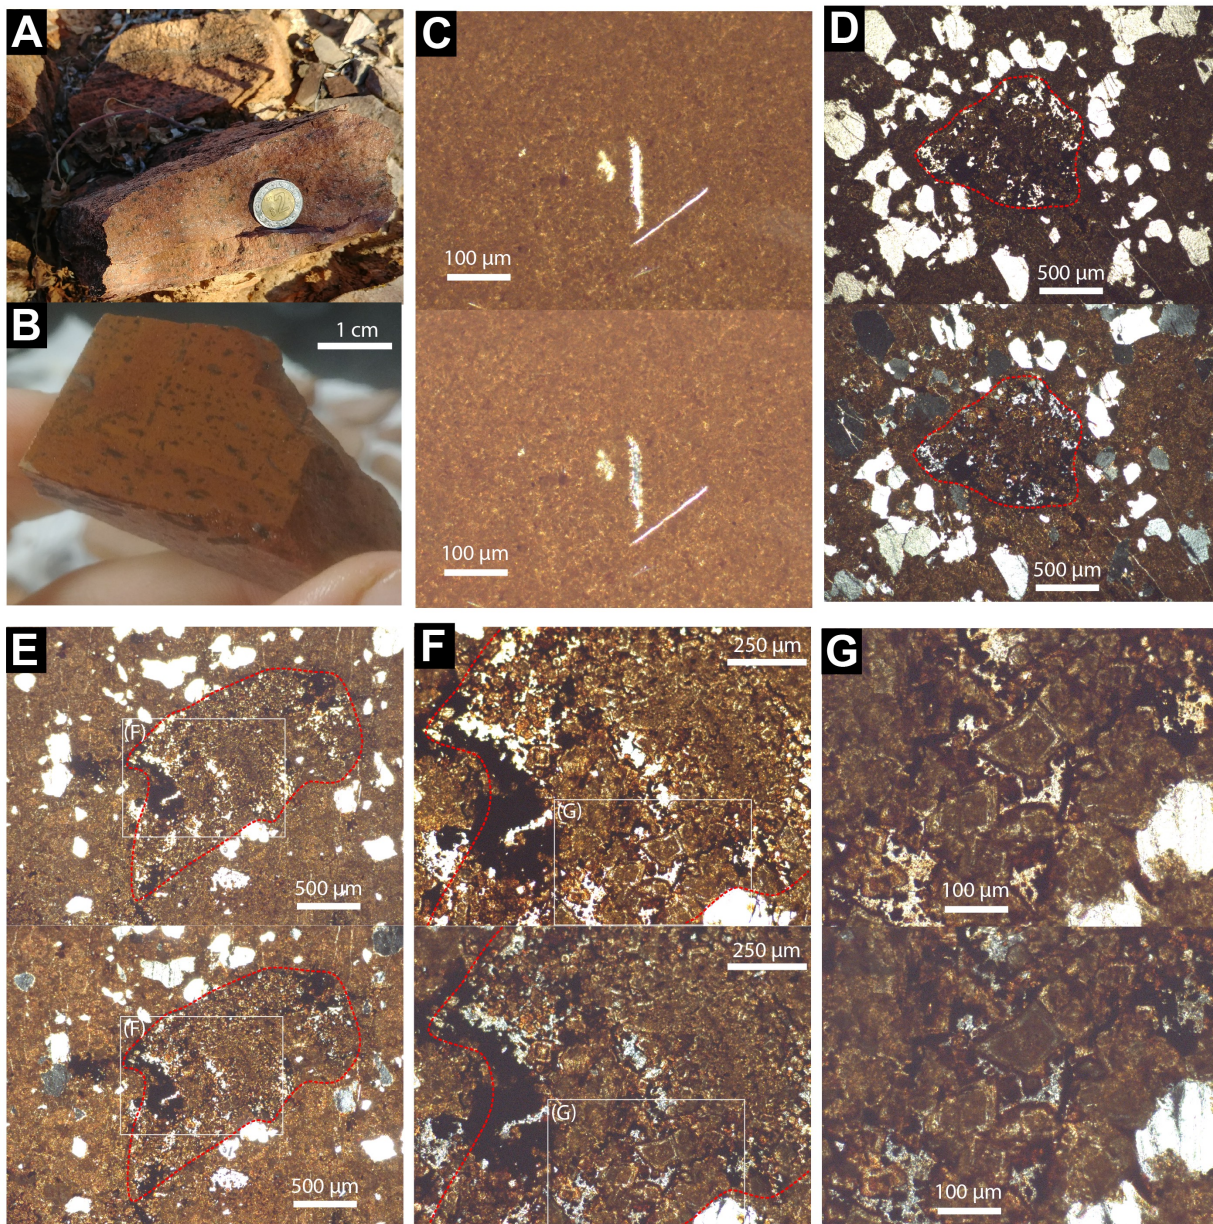



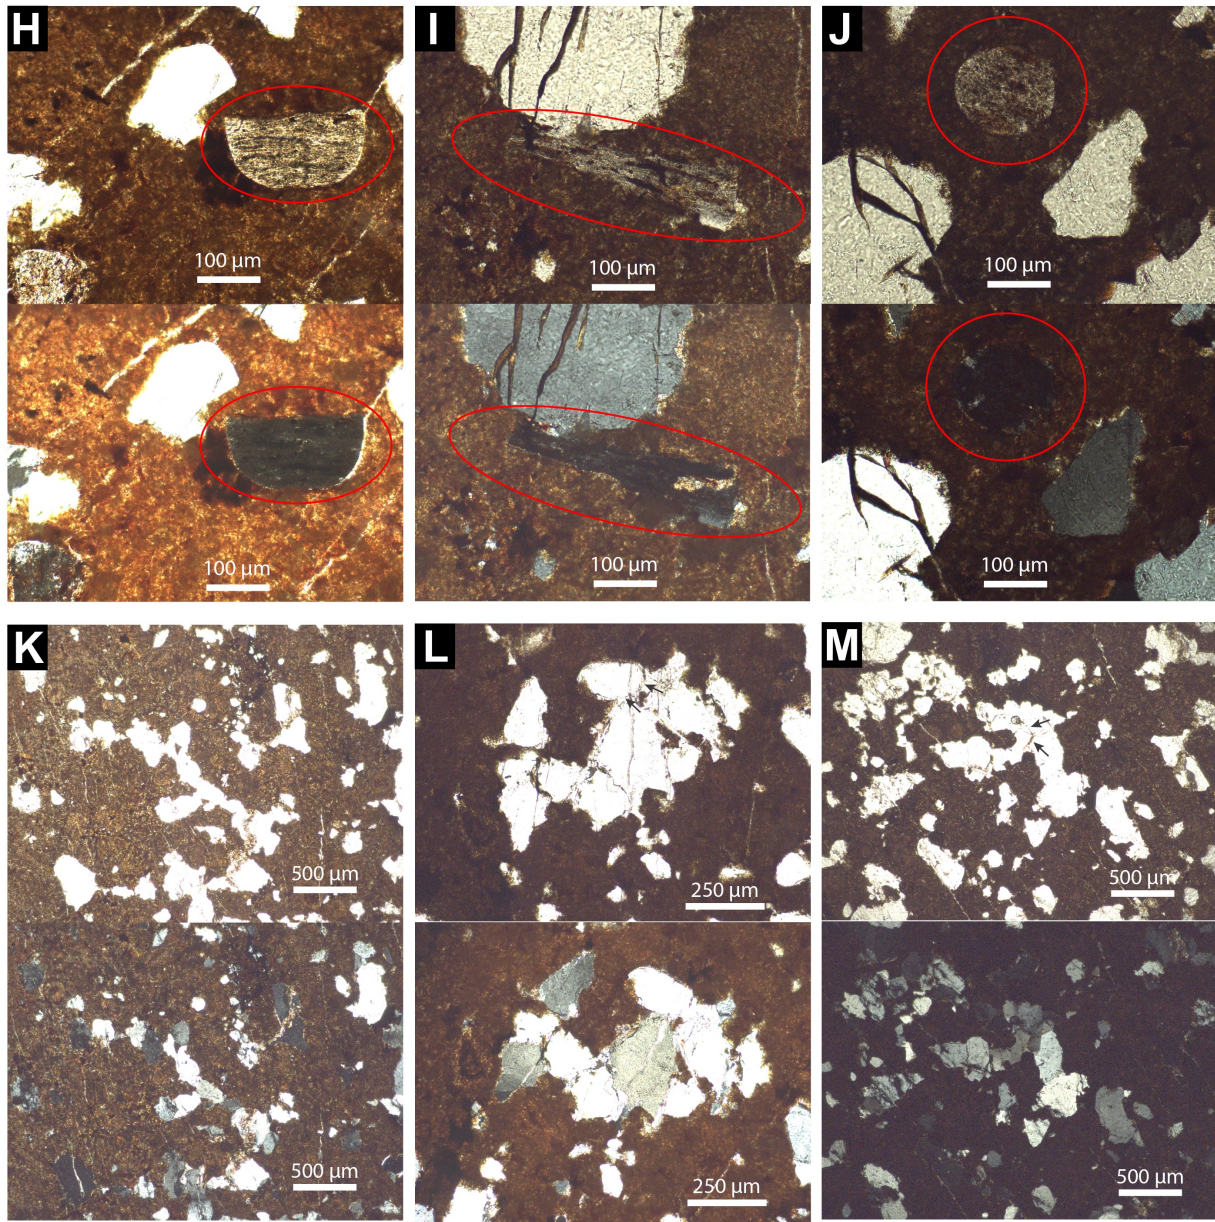

**Figure S2.** Photographs and Photomicrographs of U-Pb sample CC1801-138. Sets of photomicrographs (C-M) are displayed in plane-polarized light (above) and cross-polarized light (below). (A) Field photograph of 10-cm thick sandy dolostone bed from which CC1801-138 was sampled. Coin for scale, 12.85 mm diameter. (B) Hand sample displaying fine-grained dolomitic matrix with well-developed internal lamination. (C) Fine-grained peloidal dolomicrite. (D-G) Coarse-grained millimetric intraclasts of peloidal and sparry dolostone with secondary mineral infilling of original porosity and hematization of clay minerals, similar to features observed in devitrified and diagenetically altered tuffaceous horizons in marine carbonates (Section S2). Red dashed line indicates boundary of intraclasts. (H-J) Rounded accidental lithics of basement-derived metamorphic rock fragments, identified within red circles. (K-M) Irregularly-shaped (amoeboid) clusters of rounded to sub-rounded quartz grains displaying quartz overgrowths with



220 internal dust lines, provide evidence for derivation from older, quartz-rich sedimentary rocks.  
 221 Dust lines are indicated by black arrows.  
 222

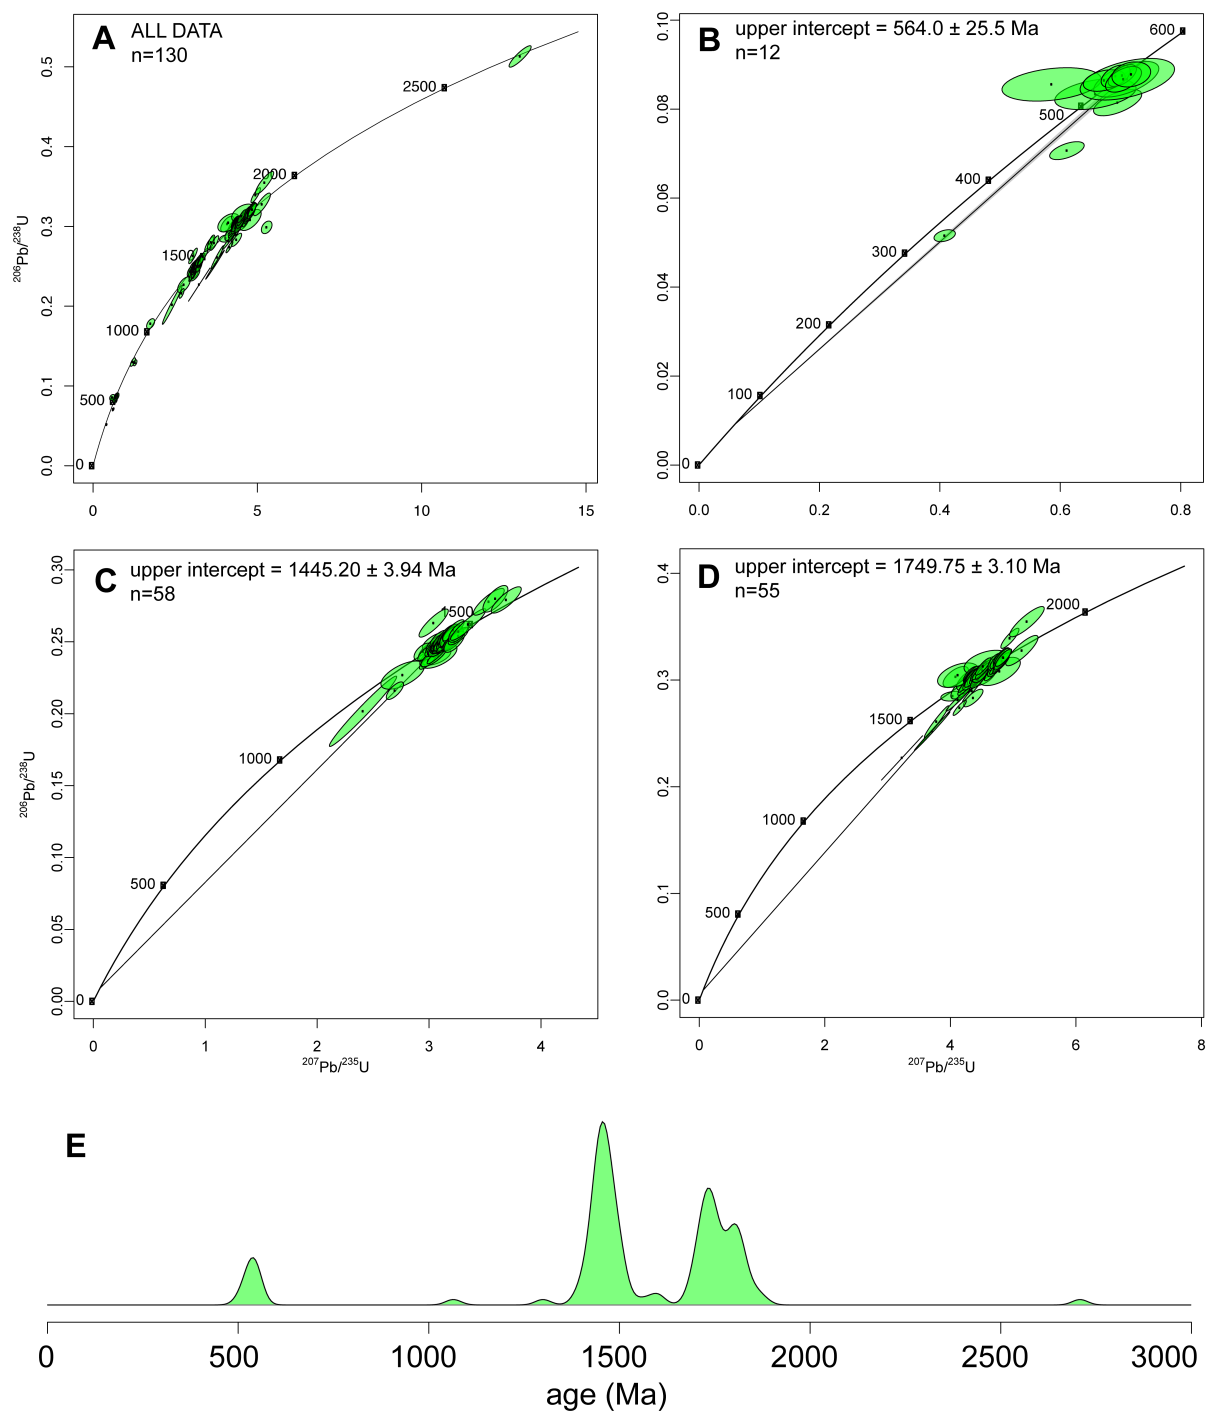

223 **Figure S3.** CC1801-138 LA-ICPMS U-Pb Concordia and Kernel Density Estimation plots. (A)  
 224 U-Pb Concordia plot of all data. (B-D) U-Pb Concordia plots of *circa* 540, 1450, and 1750 Ma  
 225 age populations, respectively. Discordia lines are anchored at 60 Ma, when peak metamorphism  
 226

occurred (González-León et al., 2017; Barrón-Díaz et al., 2019). (E) Kernel Density Estimation (KDE) plot of all concordant data (119 of 130 analyses). KDE includes a 900 Ma cutoff for  $^{206}\text{Pb}/^{238}\text{U}$  to  $^{207}\text{Pb}/^{206}\text{Pb}$  age calculations.  $^{206}\text{Pb}/^{238}\text{U}$  dates were excluded when discordance ( $^{206}\text{Pb}/^{238}\text{U}$  vs.  $^{207}\text{Pb}/^{235}\text{U}$ ) was  $>25\%$ .  $^{207}\text{Pb}/^{206}\text{Pb}$  dates were excluded when discordance ( $^{206}\text{Pb}/^{238}\text{U}$  vs.  $^{207}\text{Pb}/^{206}\text{Pb}$ ) was  $<-10\%$  or  $>+15\%$ . Plots generated using *IsoplotR* (Vermeesch, 2018).

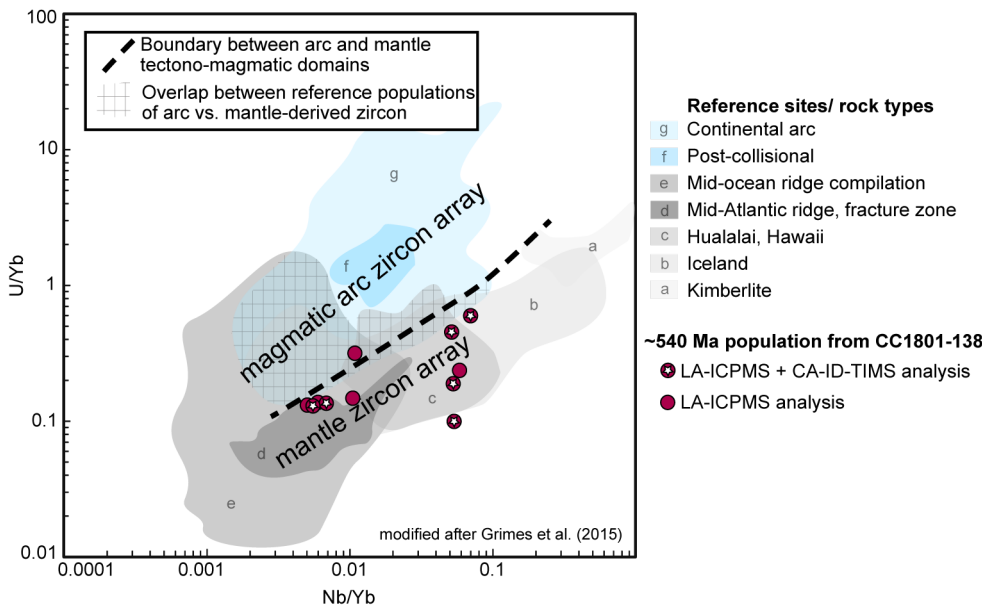

**Figure S4.** Circa 540 Ma mantle-derived zircon trace element geochemistry. Nb/Yb vs. U/Yb trace element data from the circa 540 Ma population of zircon within the dated sample CC1801-138, plotted against reference data of known tectono-magmatic setting (Grimes et al., 2015).

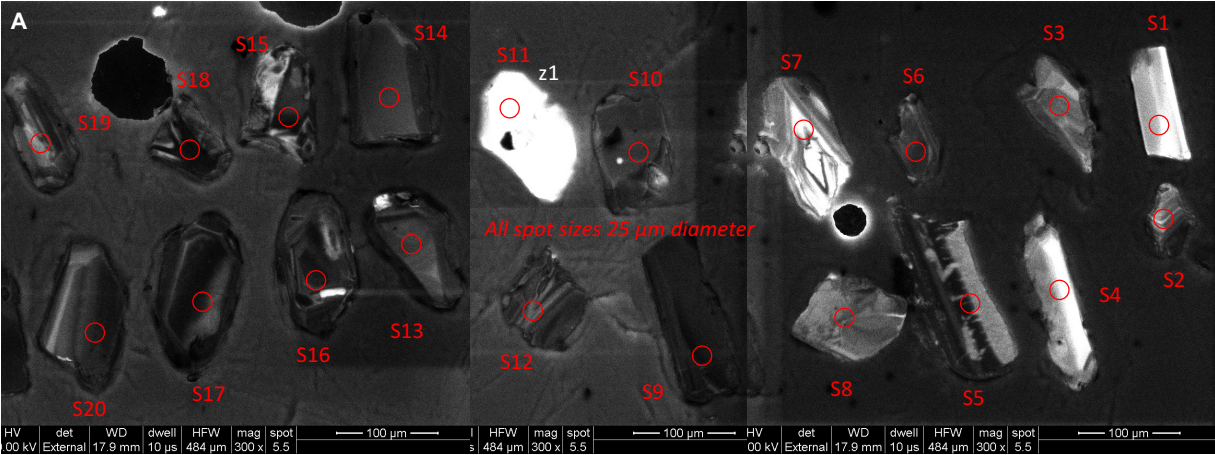

240

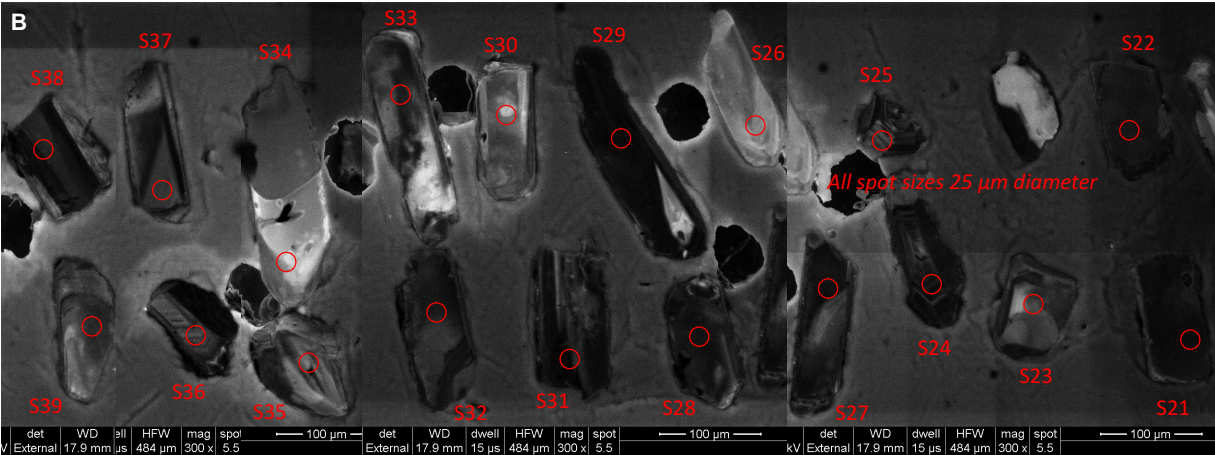

241

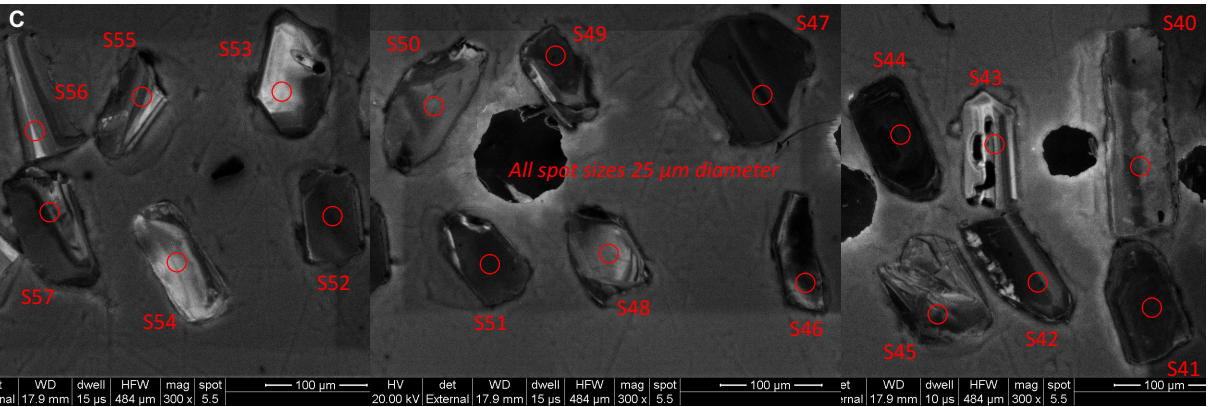

242

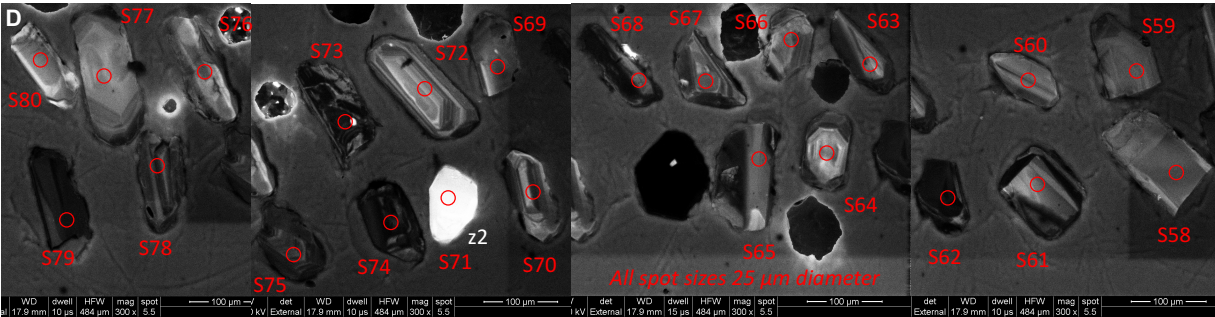

243



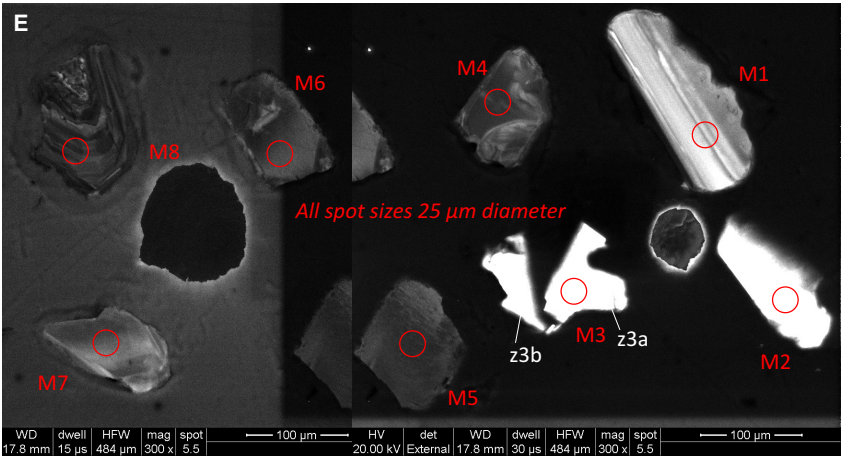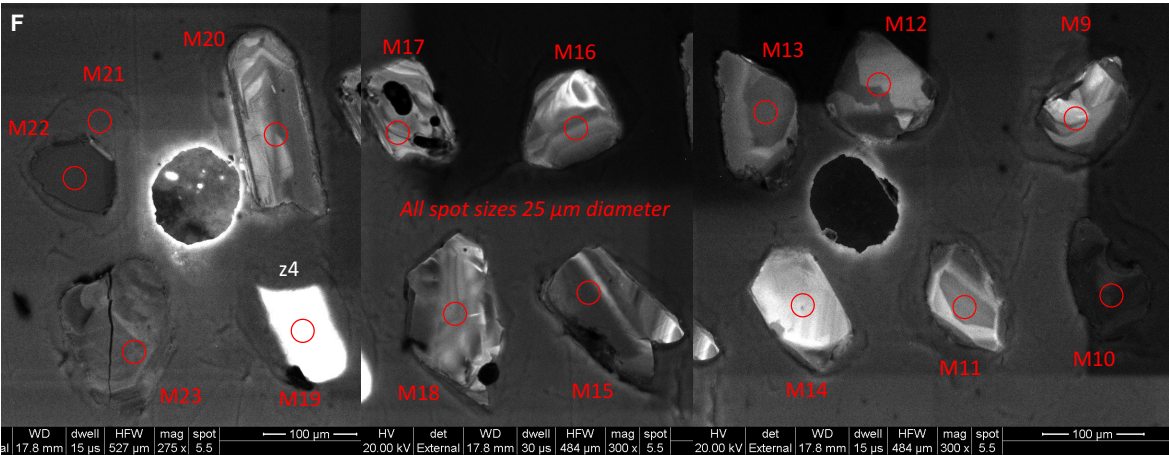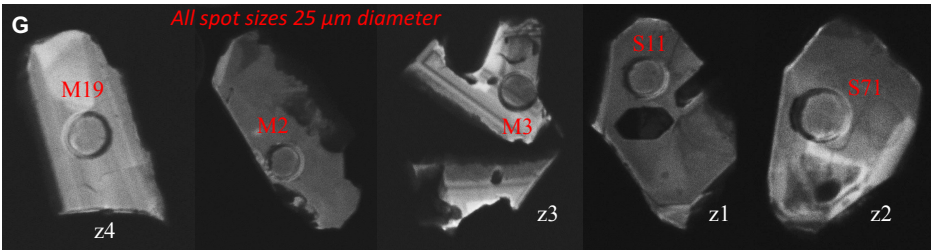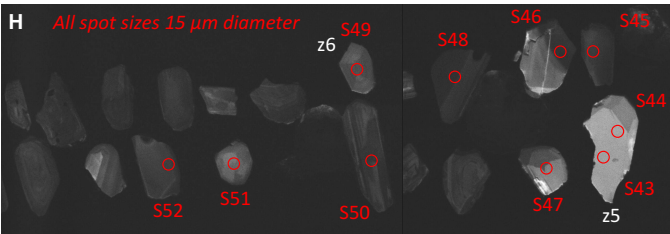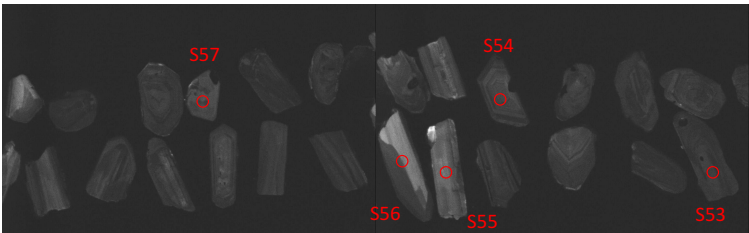

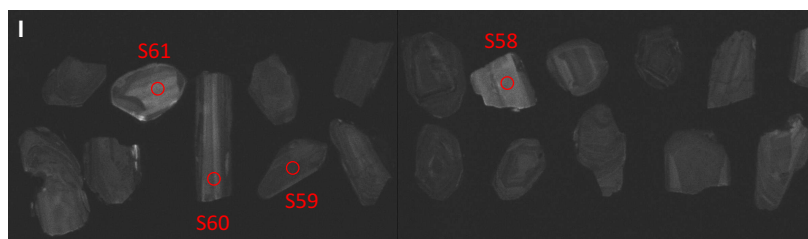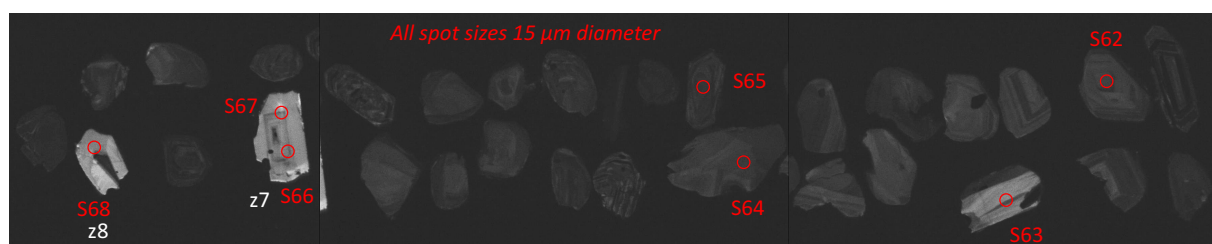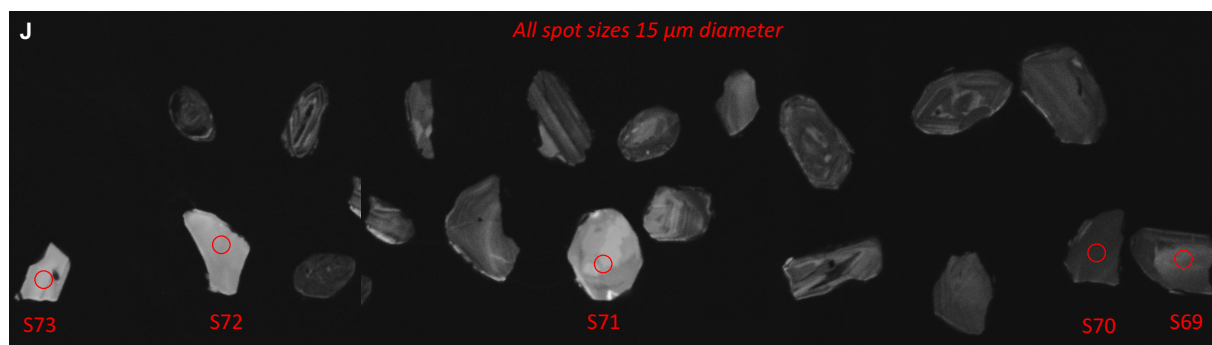

**Figure S5.** Zircon Cathodoluminescence (CL) images from dated sample CC1801-138. (A-D) Analyses S1-S80. Spot sizes 25  $\mu\text{m}$ . Imaged at UCSB (Jan 2019) from small mount EBH2019. (E-F) Analyses M1-M23. Spot sizes 25  $\mu\text{m}$ . Imaged at UCSB (Jan 2019) from medium mount EBH2019. (G) Select zircon grains re-imaged at BSU (Jan 2019) from EBH2019 mounts. (H-I) Analyses S43-S68. Spot sizes 15  $\mu\text{m}$ . Imaged at BSU (Aug 2019) from small mount Blake2019B. (J) Analyses XS69-XS73. Spot sizes are 15  $\mu\text{m}$ . Imaged at BSU (Aug 2019) from extra small mount Blake2019B. All labeled laser ablation spots correspond to LA-ICPMS analyses in Table S2. Zircons selected for CA-ID-TIMS indicated by z1-z5, and z7.

## 258 REFERENCES CITED

- 259 Barrón-Díaz, A.J., Paz Moreno, F.A., Miggins, D.P., and Iriondo, A., 2019, Geochronology and  
 260 geothermometry of the Laramide metamorphism in the Cambrian metabasalts from the  
 261 Cerro Rajón Formation, Caborca region, northwest Mexico: *Journal of South American*  
 262 *Earth Sciences*, v. 91, p. 47–56, doi:10.1016/j.jsames.2019.01.005.
- 263
- 264 Chakrabarty, S., Verma, S.K., and Shukla, M., 2018, Facies Analysis, Depositional Regime &  
 265 Sedimentation Processes in Mahanadi Basin: *ONGC Bulletin*, v. 53, p. 35–61.
- 266
- 267 Coccioni, R., Marsili, A., Montanari, A., Bellanca, A., Neri, R., Bice, D.M., Brinkhuis, H.,  
 268 Church, N., Macalady, A., Mcdaniel, A., Deino, A., Lirer, F., Sprovieri, M., Maiorano, P.,  
 269 Monechi, S., Nini, C., Nocchi, M., Pross, J., Rochette, P., Sagnotti, L., Tateo, F., Touchard,  
 270 Y., Van Simaëys, S., and Williams, G.L. 2008, Integrated stratigraphy of the Oligocene  
 271 pelagic sequence in the Umbria-Marche basin (northeastern Apennines, Italy): A potential  
 272 Global Stratotype Section and Point (GSSP) for the Rupelian/Chattian boundary: *Geological*  
 273 *Society of America Bulletin*, v. 120, p. 487–511.
- 274
- 275 Gerstenberger, H., and Haase, G., 1997, A highly effective emitter substance for mass  
 276 spectrometric Pb isotope ratio determinations: *Chemical Geology*, v. 136, p. 309–312,  
 277 doi:10.1016/S0009-2541(96)00033-2.
- 278
- 279 González-León, C.M., Solari, L., Valencia-Moreno, M., Heimpel, M.A.R., Solé, J., Becuar, E.G.,  
 280 Santacruz, R.L., and Arvizu, O.P., 2017, Late Cretaceous to early Eocene magmatic  
 281 evolution of the Laramide arc in the Nacozari quadrangle, northeastern Sonora, Mexico and  
 282 its regional implications: *Ore Geology Reviews*, v. 81, p. 1137–1157,  
 283 doi:10.1016/j.oregeorev.2016.07.020.
- 284
- 285 Grimes, C.B., Wooden, J.L., Cheadle, M.J., and John, B.E., 2015, “Fingerprinting” tectono-  
 286 magmatic provenance using trace elements in igneous zircon: *Contributions to Mineralogy*  
 287 *and Petrology*, v. 170, p. 1–26, doi:10.1007/s00410-015-1199-3.
- 288
- 289 Jackson, S.E., Pearson, N.J., Griffin, W.L., and Belousova, E.A., 2004, The application of laser  
 290 ablation-inductively coupled plasma-mass spectrometry to in situ U-Pb zircon  
 291 geochronology: *Chemical Geology*, v. 211, p. 47–69, doi:10.1016/j.chemgeo.2004.06.017.
- 292
- 293 Jaffey, A.H., Flynn, K.F., Glendenin, L.E., Bentley, W.C., and Essling, A.M., 1971, Precision  
 294 measurement of half-lives and specific activities of U235 and U238: *Physical Review C*, v.  
 295 4, p. 1889–1906, doi:10.1103/PhysRevC.4.1889.
- 296
- 297 Kiipli, E., Kallaste, T., and Kiipli, T., 2000, Hematite and goethite in Telychian marine red beds  
 298 of the East Baltic: *GFF*, v. 122, p. 281–286.
- 299
- 300 Kim, S.T., Mucci, A., and Taylor, B.E., 2007, Phosphoric acid fractionation factors for calcite  
 301 and aragonite between 25 and 75 °C: Revisited: *Chemical Geology*, v. 246, p. 135–146,  
 302 doi:10.1016/j.chemgeo.2007.08.005.

- Krogh, T.E., 1973, A low-contamination method for hydrothermal decomposition of zircon and extraction of U and Pb for isotopic age determinations: *Geochimica et Cosmochimica Acta*, v. 37, p. 485–494, doi:10.1016/0016-7037(73)90213-5.
- Kylander-Clark, A.R.C., Hacker, B.R., and Cottle, J.M., 2013, Laser-ablation split-stream ICP petrochronology: *Chemical Geology*, v. 345, p. 99–112, doi:10.1016/j.chemgeo.2013.02.019.
- Ludwig, K.R., 2003, User's manual for IsoPlot 3.0. A Geochronological Toolkit for Microsoft Excel: Berkeley Geochronology Center Special Publication, v. 4, p. 70.
- Mattinson, J.M., 2005, Zircon U-Pb chemical abrasion ("CA-TIMS") method: Combined annealing and multi-step partial dissolution analysis for improved precision and accuracy of zircon ages: *Chemical Geology*, v. 220, p. 47–66, doi:10.1016/j.chemgeo.2005.03.011.
- Odin, G., Montanari, A., Deino, A., Drake, R., Guise, P., Kreuzer, H., and Rex, D., 1991, Reliability of volcano-sedimentary biotite ages across the Eocene-Oligocene boundary (Apennines, Italy): *Chemical Geology*, v. 86, p. 203–224.
- Paton, C., Woodhead, J.D., Hellstrom, J.C., Hergt, J.M., Greig, A., and Maas, R., 2010, Improved laser ablation U-Pb zircon geochronology through robust downhole fractionation correction: *Geochemistry, Geophysics, Geosystems*, v. 11, no. 3, p. 1–36, doi:10.1029/2009GC002618.
- Rosenbaum, J., and Sheppard, S.M.F., 1986, An isotopic study of siderites, dolomites and ankerites at high temperatures: *Geochimica et Cosmochimica Acta*, v. 50, no. 6, p. 1147–1150, doi:10.1016/0016-7037(86)90396-0.
- Sahy, D., Condon, D.J., Hilgen, F.J., and Kuiper, K.F., 2017, Reducing Disparity in Radio-Isotopic and Astrochronology-Based Time Scales of the Late Eocene and Oligocene: *Paleoceanography*, v. 32, p. 1018–1035.
- Schmitz, M.D., and Schoene, B., 2007, Derivation of isotope ratios, errors, and error correlations for U-Pb geochronology using <sup>205</sup>Pb-<sup>235</sup>U-(<sup>233</sup>U)-spiked isotope dilution thermal ionization mass spectrometric data: *Geochemistry, Geophysics, Geosystems*, v. 8, no. 8, p. 1–20, doi:10.1029/2006GC001492.
- Sláma, J., Košler, J., Condon, D.J., Crowley, J.L., Gerdes, A., Hanchar, J.M., Horstwood, M.S., Morris, G.A., Nasdala, L., Norberg, N., and Schaltegger, U., 2008, Plešovice zircon - A new natural reference material for U-Pb and Hf isotopic microanalysis: *Chemical Geology*, v. 249, p. 1–35, doi:10.1016/j.chemgeo.2007.11.005.
- Ullah, R., Fengjuin, N., Chengyong, Z., Izhar, S., Safdar, I., Xin, Z., and Ali, A., 2020, Occurrence of a Likely Tuff Bed between the Middle and Upper Siwaliks, Taunsa area,

Dera Ghazi Khan, Eastern Sulaiman Range, Pakistan: *International Journal of Economic and Environmental Geology*, v. 11, p. 24–34.

Vermeesch, P., 2018, IsoplotR: A free and open toolbox for geochronology: *Geoscience Frontiers*, v. 9, p. 1479–1493, doi:10.1016/j.gsf.2018.04.001.

Watson, E.B., Wark, D.A., and Thomas, J.B., 2006, Crystallization thermometers for zircon and rutile: *Contributions to Mineralogy and Petrology*, v. 151, no. 4, p. 413–433, doi:10.1007/s00410-006-0068-5.

Wiedenbeck, M., Allé, P., Corfu, F., Griffin, W.L., Meier, F., Oberli, F., von Quadt, A., Roddick, J.C., and Spiegel, W., 1995, Three natural zircon standards for U-Th-Pb, Lu-Hf, trace element and REE analyses: *Geostandards Newsletter*, v. 19, p. 1–23.
